# Supplementary material for: Relevance of tissue Doppler in the quantification of stress echocardiography for the detection of myocardial ischemia in clinical practice
Source: Cardiovasc Ultrasound. 2005 Jan 28;3:2. doi: 10.1186/1476-7120-3-2 (PMC548514; doi:10.1186/1476-7120-3-2)
Supplement: Additional File 1 — Table 1.TDI vs visual assessment of myocardial ischemia during dobutamine stress echocardiography. [file 1476-7120-3-2-S1.xls]

## Sheet: Foglio1
Table 1. TDI vs visual assessment of myocardial ischemia during dobutamine stress echocardiography
				Tissue Doppler Imaging				SRI		Wall Motion Analysis
Authors	Year	CAD Patients	Reference technique	Sensitivity	Specificity		Sensitivity	Specificity		Sensitivity	Specificity
Cain et al.	2001	114	Coronary angiogarphy	83	72		-	-		88	81
Mydise investigators	2003	48	Coronary angiography	67-69/80-93*	60-67/80-82*		-	-		NP	NP
Voigt et al	2003	44	Perfusion Scintigraphy	NP	NP		86	89		81	82
Voigt et al	2004	44	Perfusion Scintigraphy	74	63		82	85		81	82
SRI= Strain Rate Imaging
*=corrected sensitivity and specificity
NP= not performed
